# Supplementary material for: Discovery of Novel TASK-3 Channel Blockers Using a Pharmacophore-Based Virtual Screening
Source: MDPI journal article supplement (doi:10.3390/ijms20164014), 2019-08-17
Supplement: s1 [file s1]

# Discovery of novel TASK-3 channel blockers using a pharmacophore-based virtual screening.

David Ramírez, Guierdy Concha, Bárbara Arévalo, Luis Prent-Peñaloza, Leandro Zúñiga, Aytug K. Kiper, Susanne Rinné, Miguel Reyes-Parada, Niels Decher, Wendy González, Julio Caballero.

**Table S1. e-Pharmacophore general site measurements.** *e*-Pharmacophore hypothesis No.1 site measurements distances(Å) and angles (degrees).

| Site 1                                               |        | Site 2 | Distance |
|------------------------------------------------------|--------|--------|----------|
| A1                                                   |        | A2     | 5.943    |
| A1                                                   |        | R      | 8.366    |
| A2                                                   |        | R      | 3.654    |
| Site 1                                               | Site 2 | Site 3 | Angle    |
| A1                                                   | A2     | R      | 119.4    |
| A1                                                   | R      | A2     | 38.2     |
| A2                                                   | A1     | R      | 22.4     |
| A1, A2 = Hydrogen bond acceptors, R = aromatic ring. |        |        |          |

**Table S2. Binding site residues in the TASK-3 model T3-twiOO of DR16 and DR16.1.** *First column*, residues interacting only with DR16. *Second column*, residues interacting with DR16 and DR16.1. *Third column*, residues interacting only with DR16.1. Residues were collected from the 2D diagrams (Figures 3D and 4B). These diagrams show residues within 5 Angstrom of the drugs.

| DR16   | Common residues                      | DR16.1            |
|--------|--------------------------------------|-------------------|
| Val115 | Thr198                               | Asn133            |
| Leu171 | Leu197                               | Thr121            |
| Phe194 | Thr199                               | Phe125            |
|        | Thr233                               | Thr93*            |
|        | Leu232                               | Thr92             |
|        | Leu239*                              | Gln126*           |
|        | Ile235                               | Glu130            |
|        | Gly236*                              | Ala237*           |
|        | Leu122 (Chain A)*                    | Leu122 (Chain B)* |
|        | Pro119                               | Gly129            |
|        | Ile118                               | Asn240            |
| Yellow | Residues of the A1899 binding site   |                   |
| *      | Residues of the PK-THPP binding site |                   |

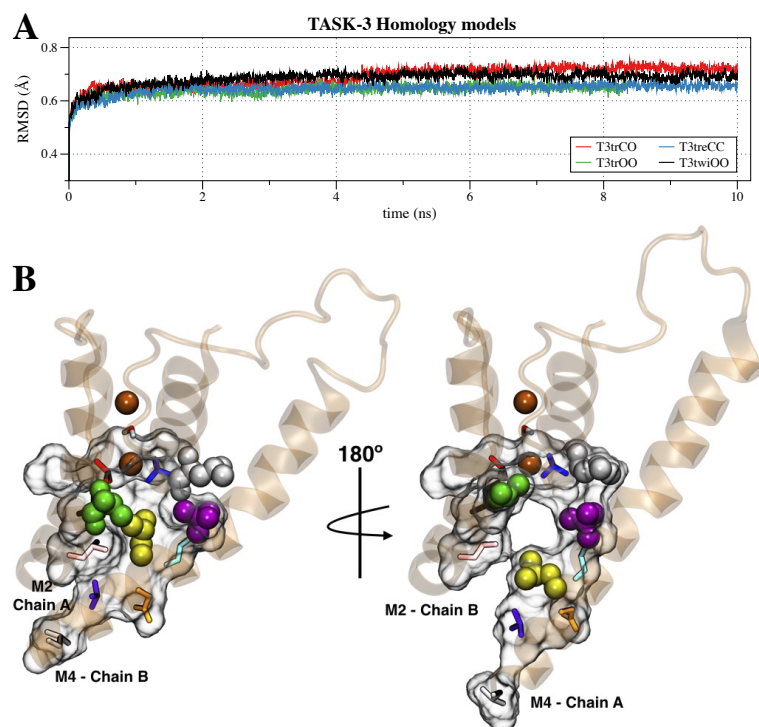

**Figure S1.** **A.** RMSD for backbone atoms of TASK-3 homology models during the 10ns-MDs. RMSD for T3trCO, T3trOO, T3treCC and T3twiOO are represented in red, green, blue and black respectively. **B.** Fenestration states representation in T3-trCO model. Left. Close fenestration state. Right. Open fenestration state. Residues Thr93 (red) of the first pore loop (P1), Thr199 (blue) of the second pore loop (P2), Ile118 (black) and Leu122 (pink) of the M2 segment, Gly236 (cyan), Asn240 (orange), Val243 (violet) and Leu247 (silver) of the M4 segment are shown in sticks representation. Val 115, (green), Leu197 (white), Ile235 (magenta) and Leu239 (yellow) are showed in van der Waals representation. T3-trCO (orange) is showed in cartoon representation. For better display of fenestration state, the T3-trCO model is shown in two orientations (rotated by 180°). K<sup>+</sup> ions located in S2 and S4 positions are showed in van der Waals representation. Waters located in S3 position is showed in sticks representation.

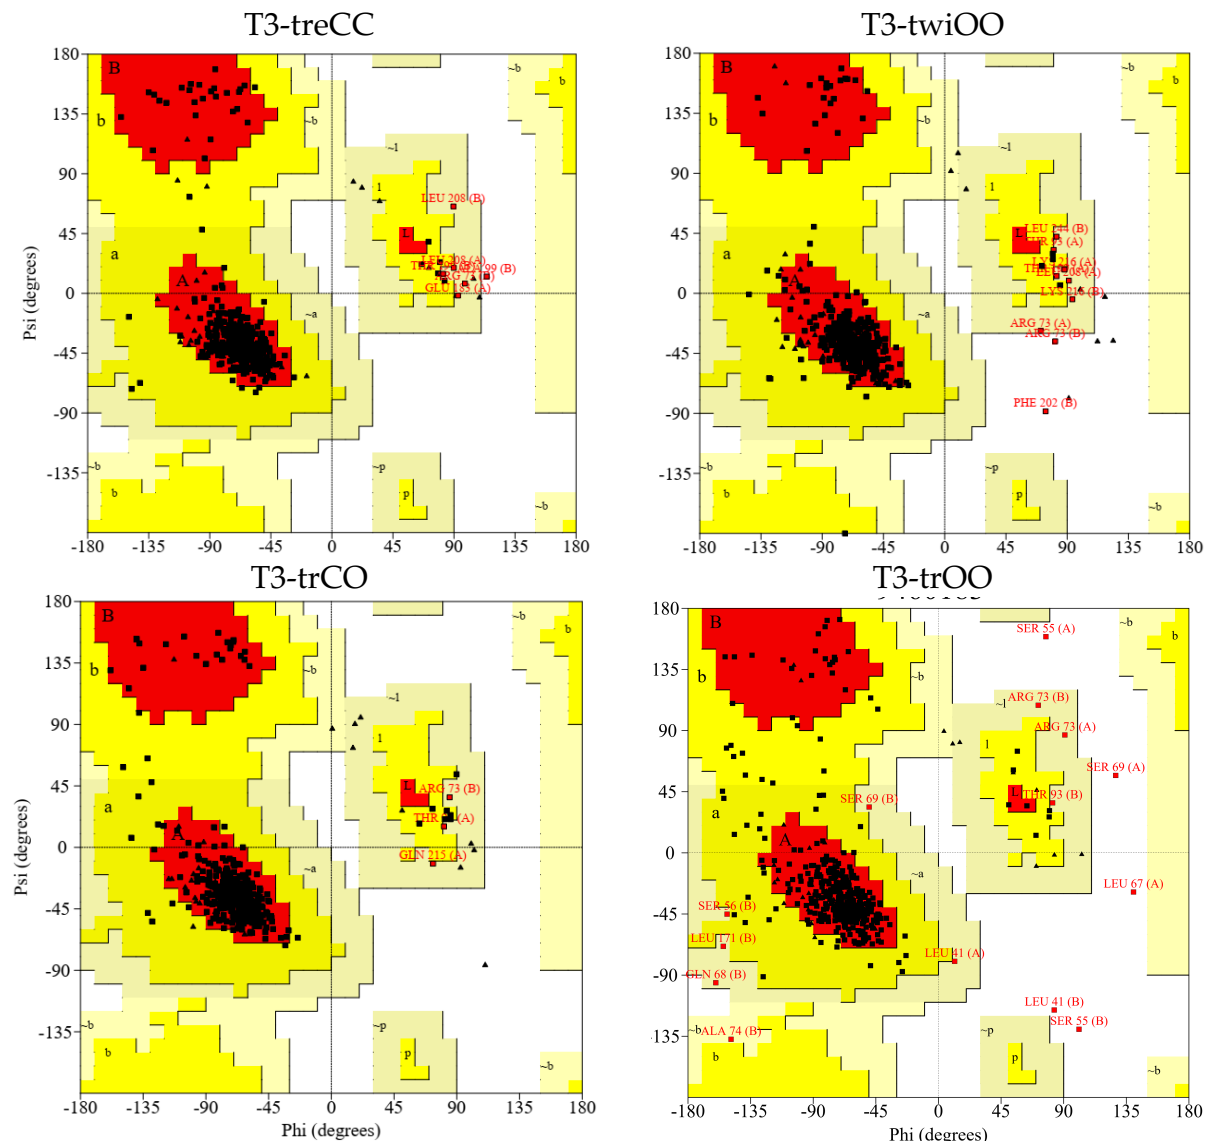

| Model |          | Residues in most favored regions (%) | Residues in disallowed regions (%) |
|-------|----------|--------------------------------------|------------------------------------|
| A     | T3-treCC | 94.3                                 | 0.2                                |
| B     | T3-twiOO | 91.1                                 | 0.5                                |
| C     | T3-trCO  | 93.5                                 | 0.0                                |
| D     | T3-trOO  | 90.2                                 | 0.4                                |

**Figure S2. Procheck validation of the homology models.** Ramachandran plot and statistics of TASK-3 homology models.

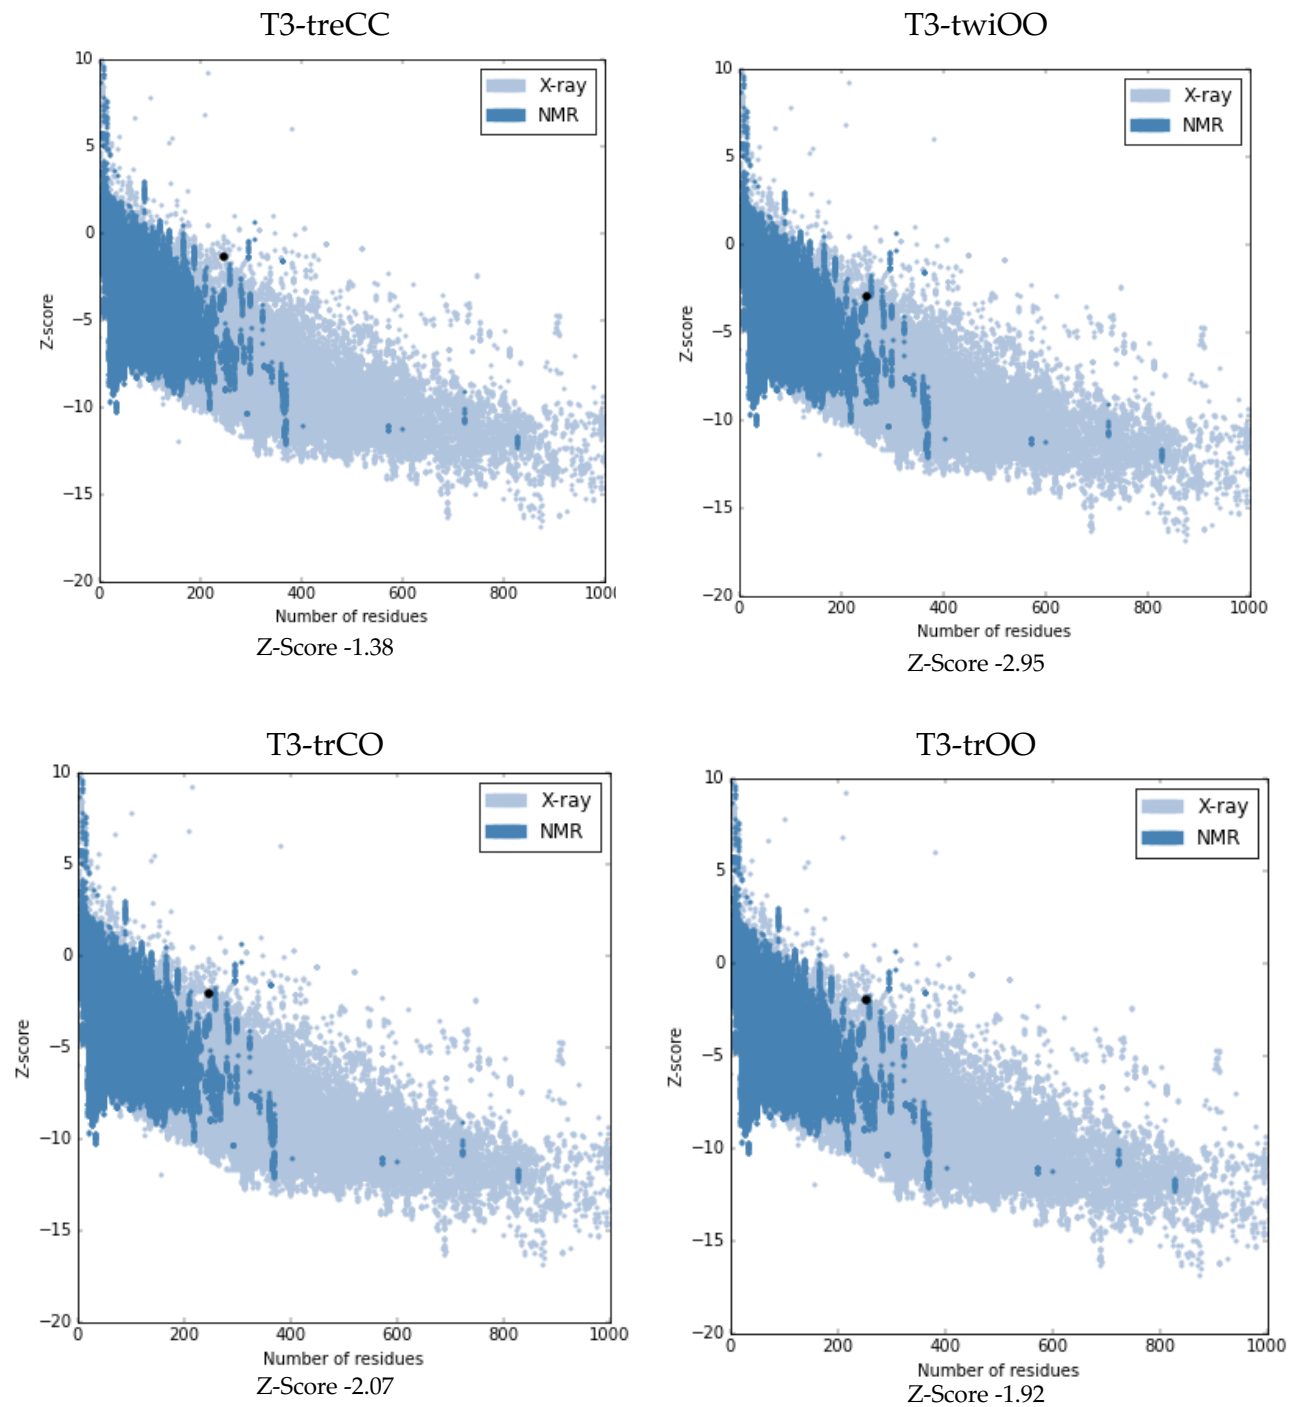

**Figure S3. ProSA validation.** Z-Score plots comparing the TASK-3 homology models with the structures in the Protein DataBank.

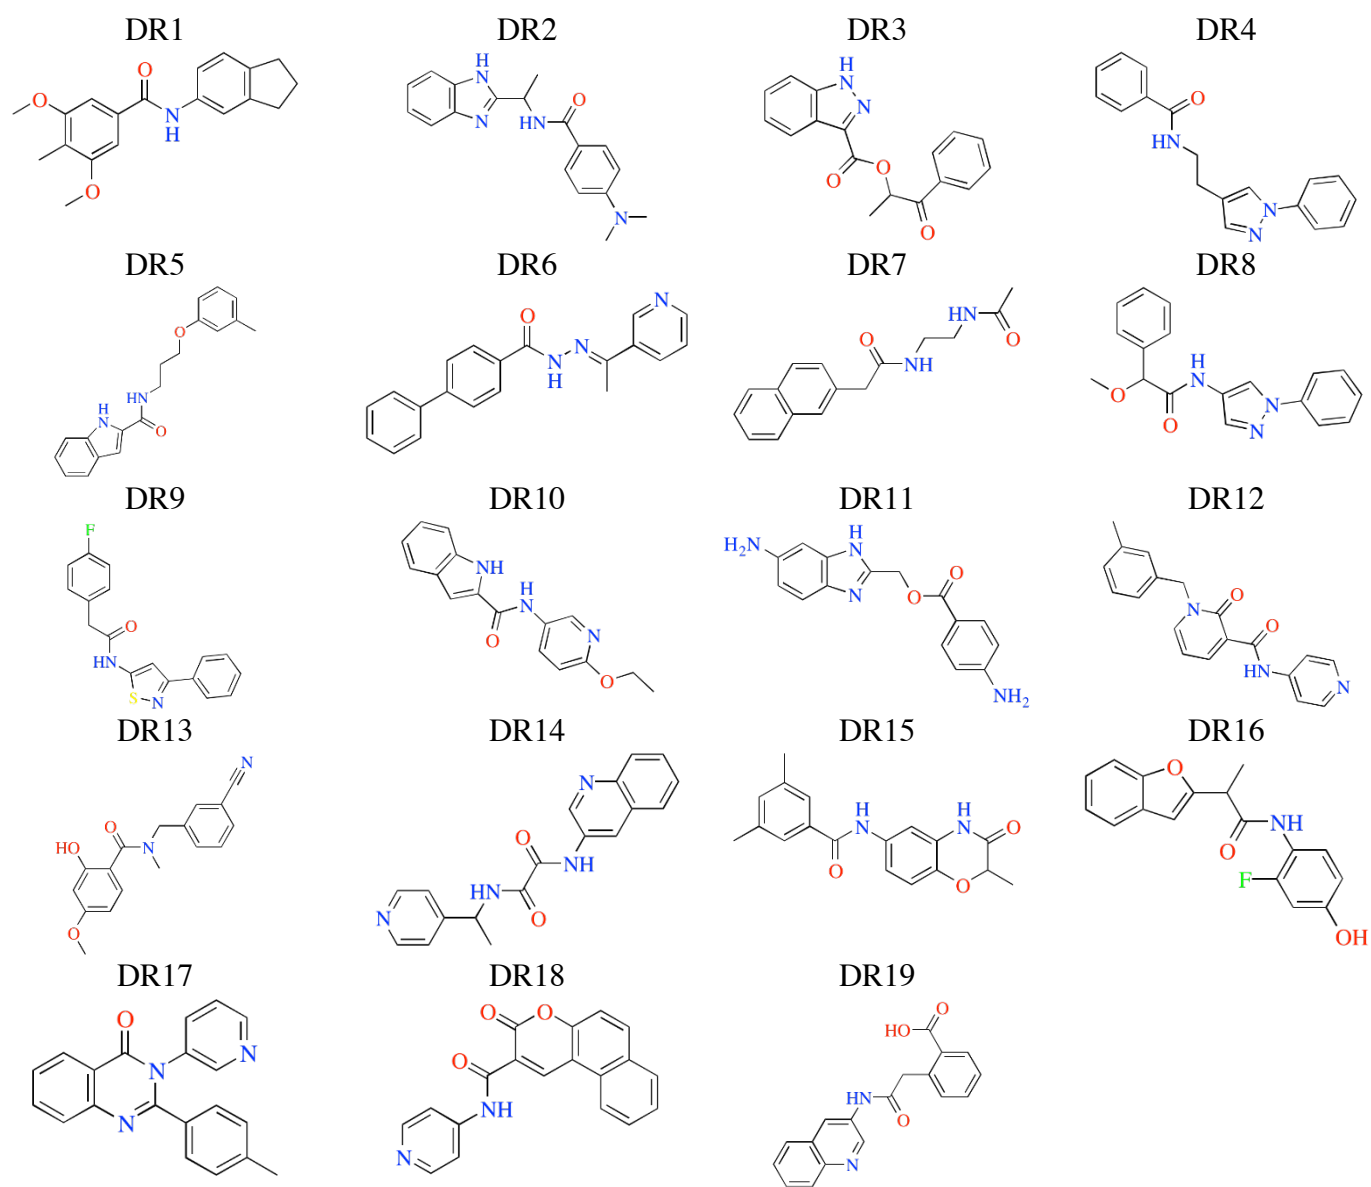

**Figure S4.** Identified hits through virtual screening protocol.

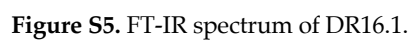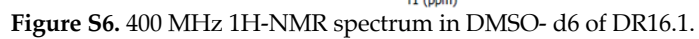

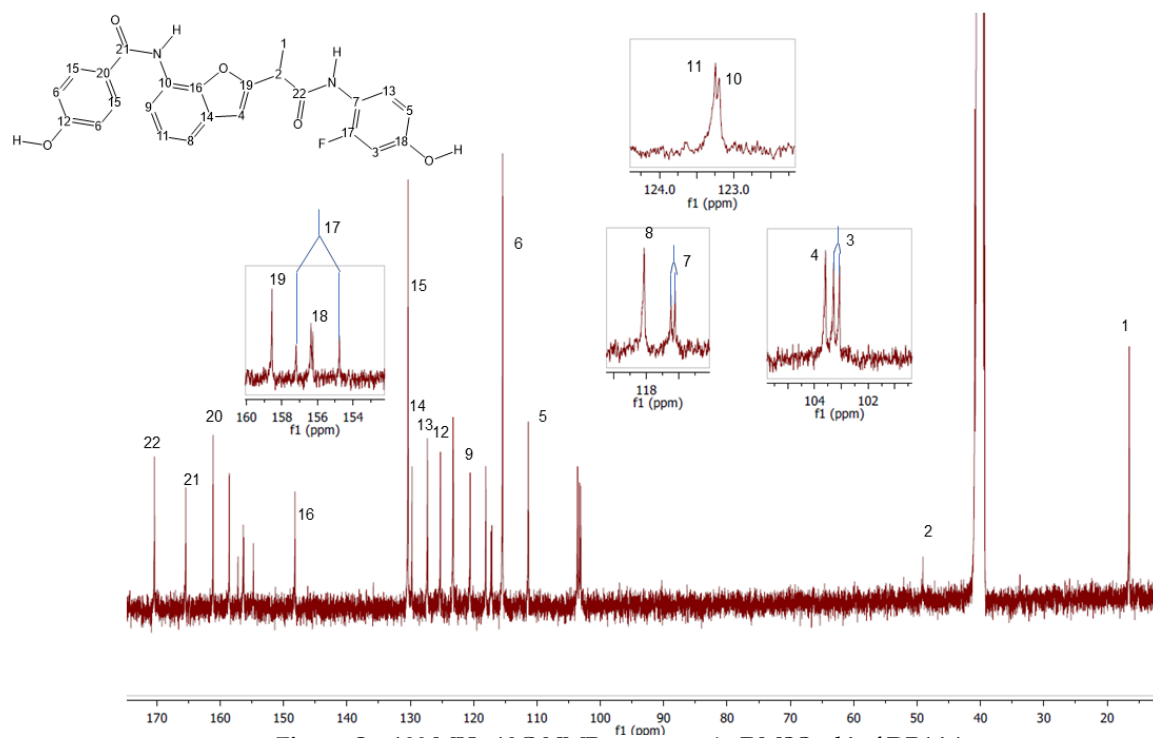

**Figure S7.** 100 MHz <sup>13</sup>C-NMR spectrum in DMSO- *d*<sub>6</sub> of DR16.1.

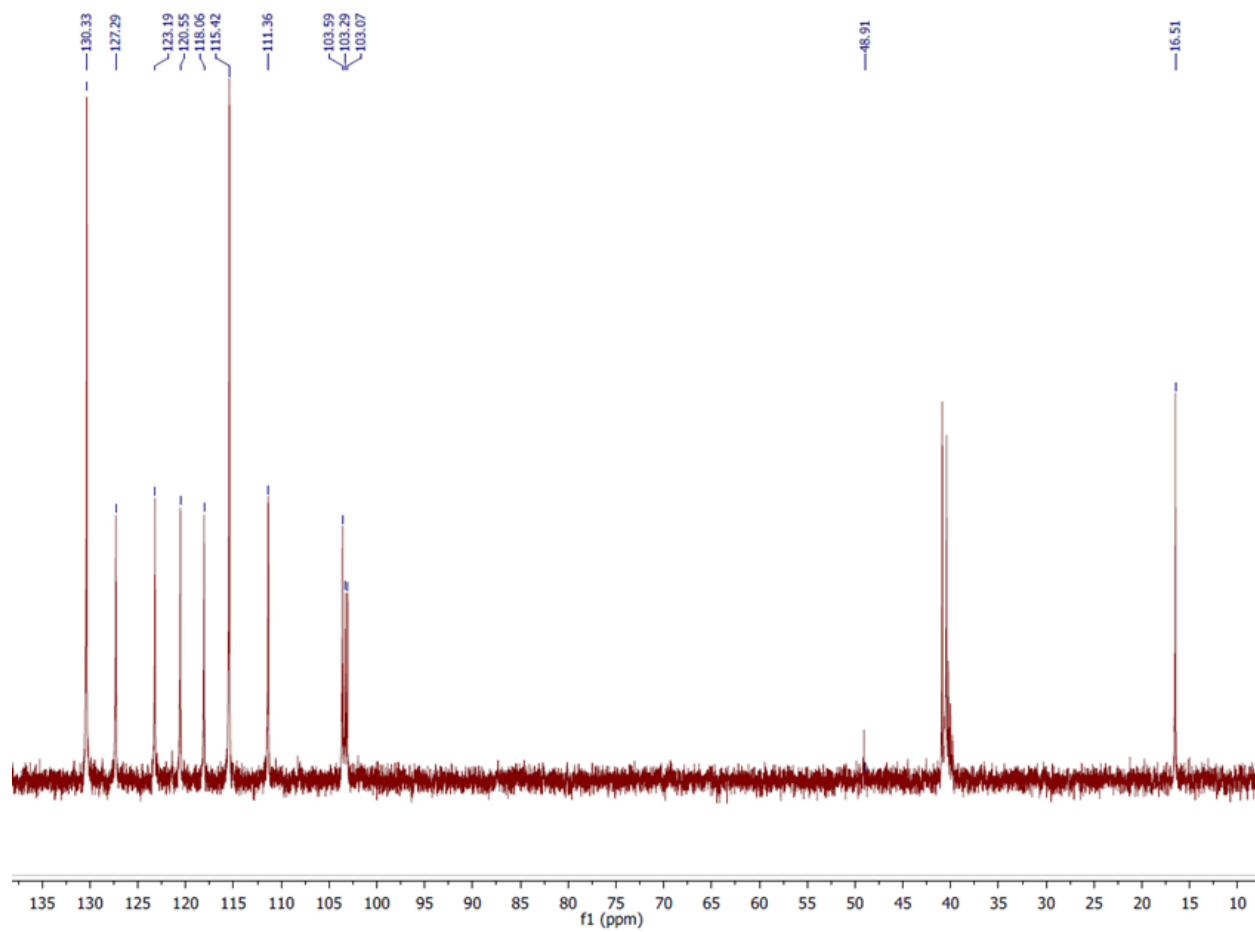

**Figure S8.** DEPT-135 spectrum in DMSO- d6 of DR16.1.



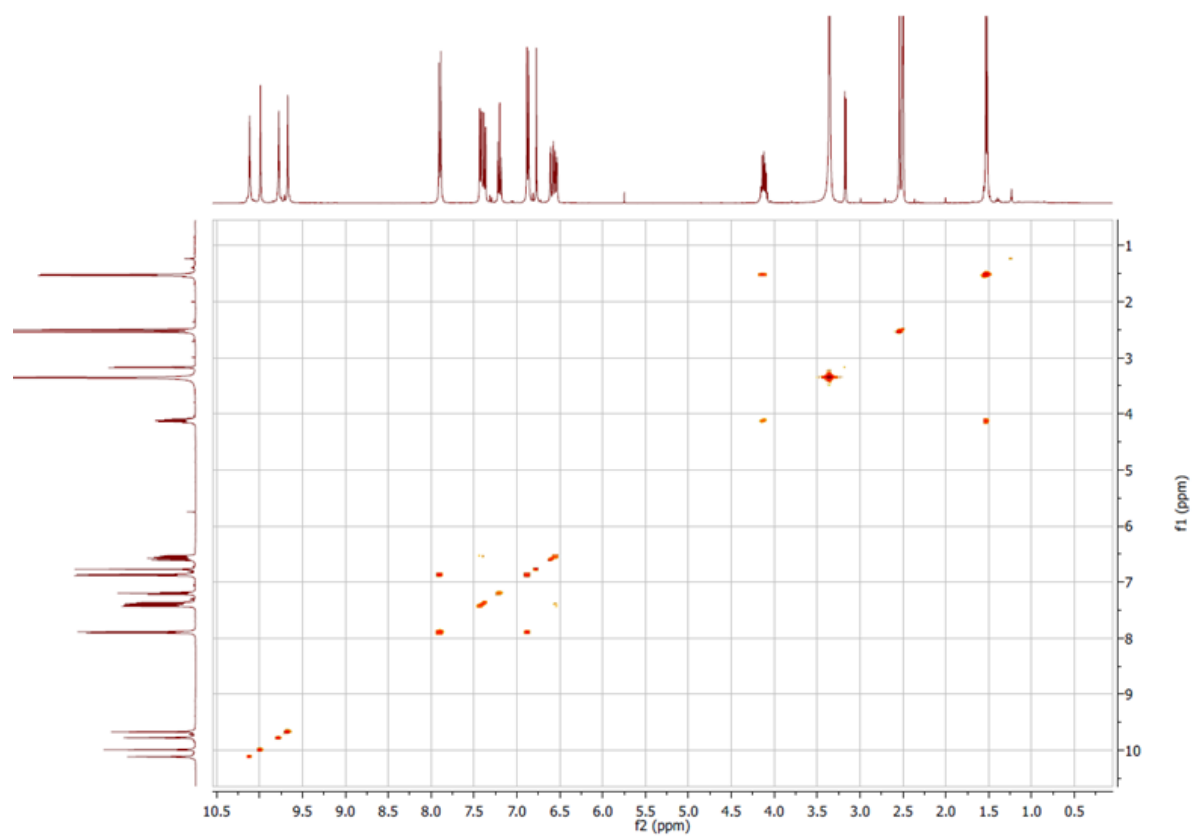

**Figure S9.** COSY spectrum in DMSO- d<sub>6</sub> of DR16.1.

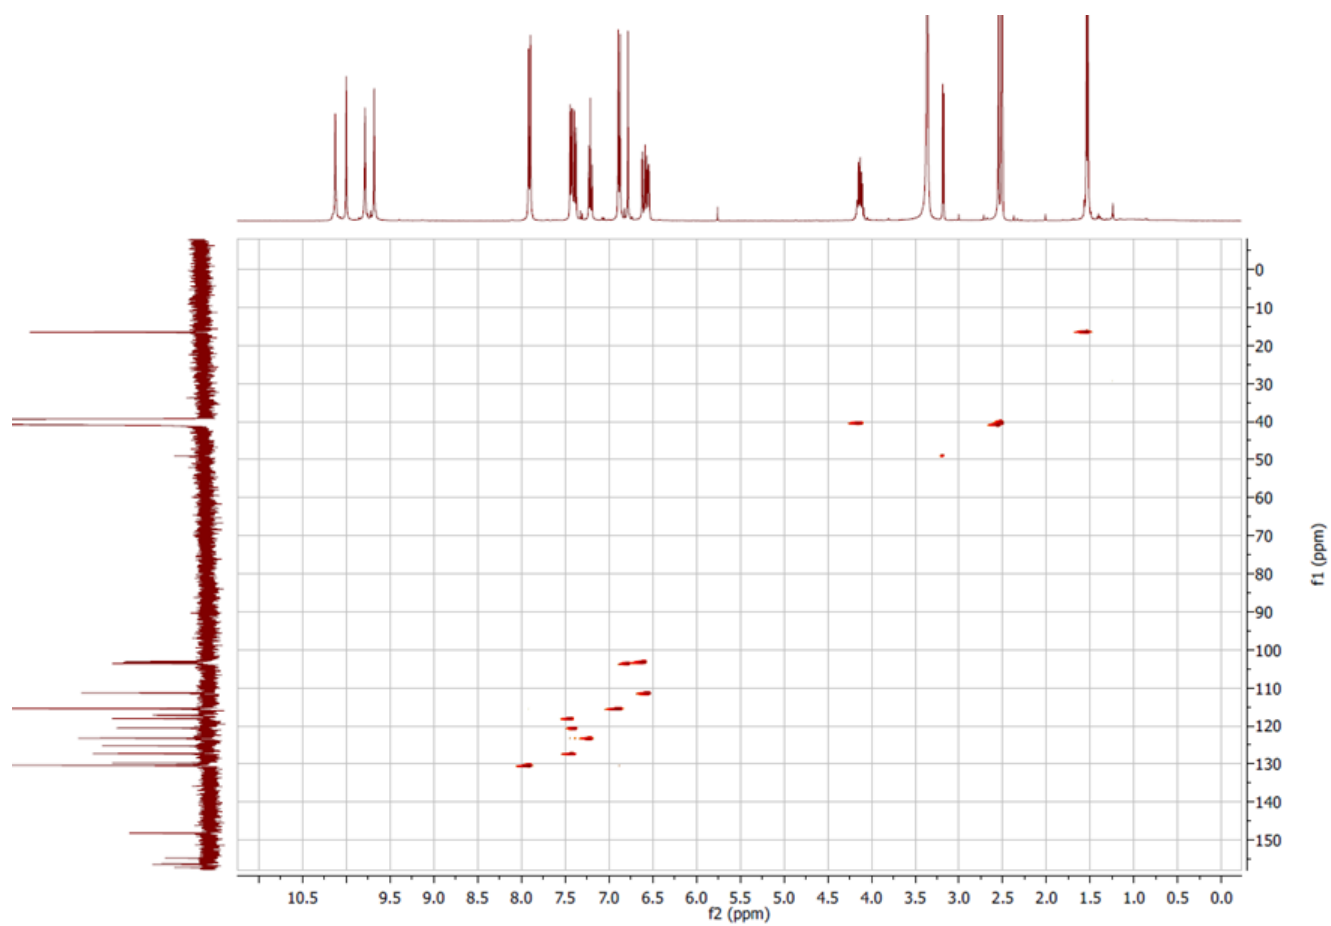

Figure S10. HMQC spectrum in DMSO-  $d_6$  of DR16.1.

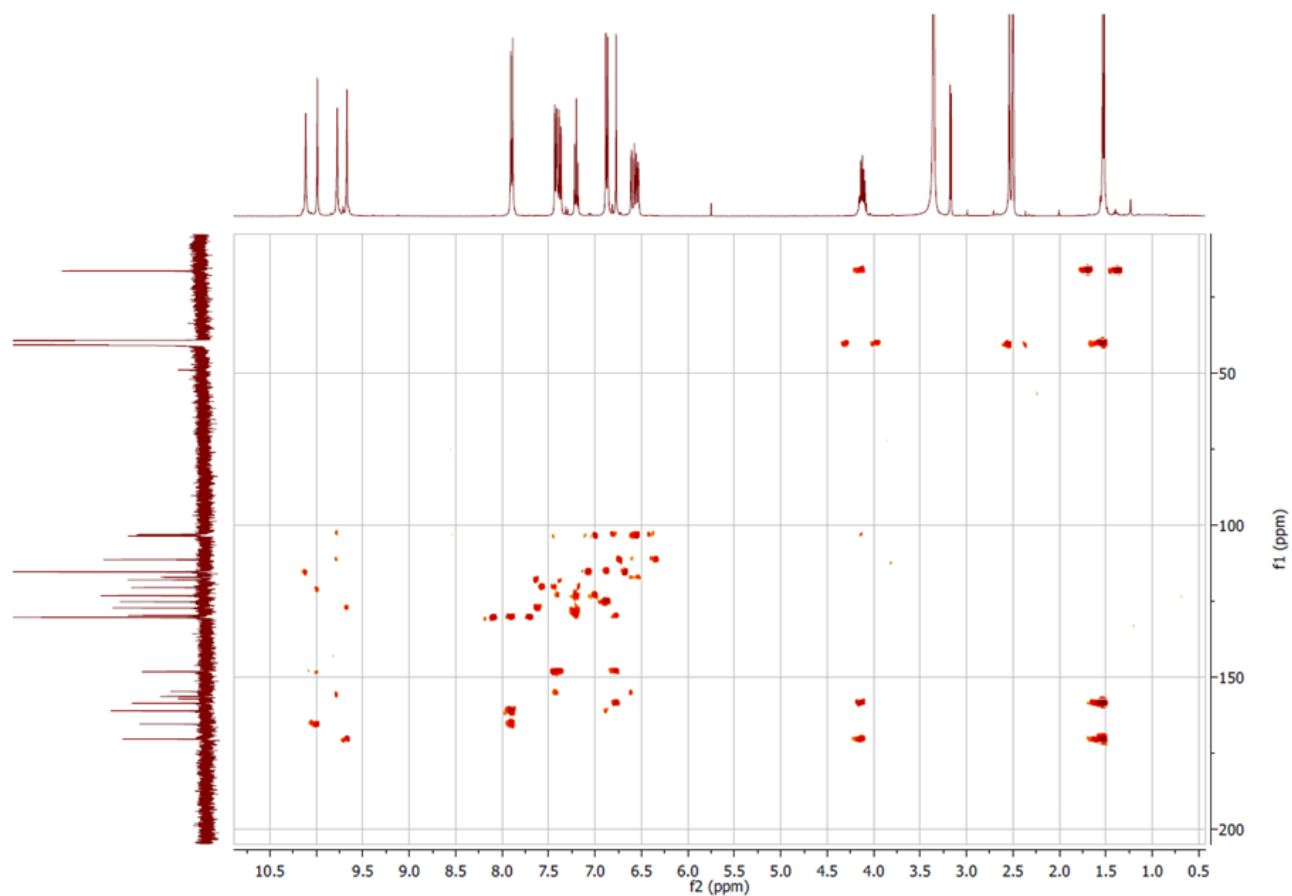

**Figure S11.** HMBC spectrum in DMSO- d6 of DR16.1.

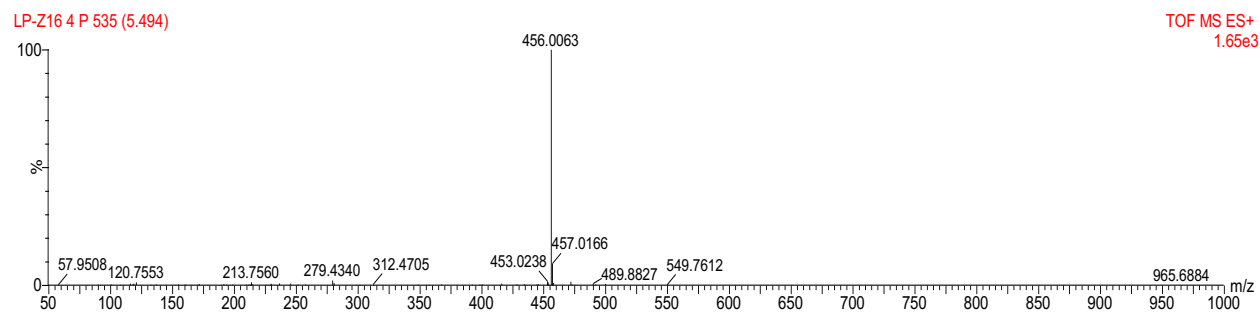

**Figure S12.** Mass spectrum of DR16.1 with positive ionization.

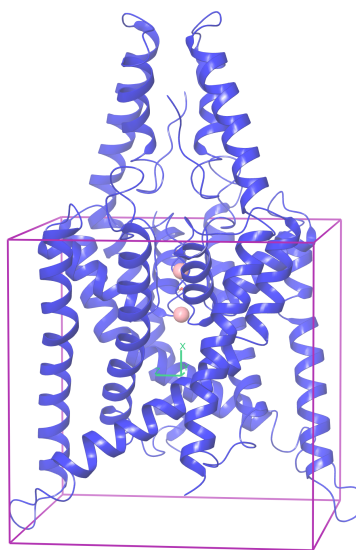

**Figure S13.** Grid box of the T3-twiOO model (blue) used in the study. The dimensions of the grid box were  $(35 \times 35 \times 35) \text{ \AA}^3$ . The same grid box was used for all TASK-3 models.
